# Supplementary material for: CsCDPK6, a CsSAMS1-Interacting Protein, Affects Polyamine/Ethylene Biosynthesis in Cucumber and Enhances Salt Tolerance by Overexpression in Tobacco
Source: MDPI journal article supplement (doi:10.3390/ijms222011133), 2021-10-15
Supplement: s1 [file s1]

Table S1: Primer sequences

| Primer                               | Sequence (5'-3')                                          |
|--------------------------------------|-----------------------------------------------------------|
| CsCDPK6-F                            | ATCAACCCAGCACAACCGATAC                                    |
| CsCDPK6-R                            | CAAGGAATCACCCCGCTTT                                       |
| pGBKT7-SAMS1-F                       | GGCCATGGAGGCCATGGAGACCTTTC                                |
| pGBKT7-SAMS1-R                       | CCGCCCCGGAATTAAGATTGAGGCT                                 |
| pGADT7-CDPK6-F                       | agattacgctcatatggccatggaggccATGGGTGTTTGTTCG               |
| pGADT7-CDPK6-R                       | cagctcgagctcgatggatcccAATATGAGGTCTTGAACATAATAC            |
| SAMS1-NF<br>(SAMS1 <sup>n</sup> -NF) | tcaccatttacgaacgatagttaattaaATGGAGACCTTTCTATTT            |
| SAMS1-NR<br>(SAMS1 <sup>c</sup> -NR) | ccaccactgccacctcctccactagtAGATTGAGGCTTCTCCAC              |
| CDPK6-CF                             | tcaccatttacgaacgatagttaattaaATGGGTGTTTGTTCG               |
| CDPK6-CR                             | ccaccactgccacctcctccactagtAATATGAGGTCTTGAACATAAT          |
| SAMS1 <sup>n</sup> -NR               | ccaccactgccacctcctccactagtGTGAACACCCTGAGCGATA             |
| SAMS1 <sup>z</sup> -NF               | tcaccatttacgaacgatagttaattaaATGGGCCACTTCACAAAG            |
| SAMS1 <sup>z</sup> -NR               | ccaccactgccacctcctccactagtGACAAAACGGCCTGAAGGG             |
| SAMS1 <sup>c</sup> -NF               | tcaccatttacgaacgatagttaattaaATGATTGGTGGCCCTCATG           |
| pGEX-FLAG-F                          | CTCAAGCAATCAAGCATTCTAC                                    |
| pGEX-FLAG-R                          | AGGACACACTTTAACAATAGGCGA                                  |
| pCsVMN-HA-F                          | TACTGAGGATACAACCTCAGAGAAA                                 |
| pCsVMN-HA-R                          | GAAGCGTAATCTGGAACATCATAC                                  |
| CsCDPK6-FLAG-F                       | cgcggtggcgccgctctagaATGGGTGTTTGTTCG                       |
| CsCDPK6-FLAG-R                       | ttcctgcagccggggatccAATATGAGGTCTTGAACATAACTTGCA            |
| CsSAMS1-HA-F                         | aattctgcagtcgacggtaccATGGAGACCTTTCTATTTACCTCAGAA          |
| CsSAMS1-HA-R                         | tgggtaacctgccatggatccAGATTGAGGCTTCTCCCACTCGCAGACGAG<br>GG |
| Tobacco-CDPK-F                       | ttacaattaccatggggcgcgccATGGGTGTTTGTTCG                    |
| Tobacco-CDPK-R                       | aacatcgtagggtaggtaccAATATGAGGTCTTGAACATAACTTGCA           |
| pV190-F                              | CGATCAGTCTATTGTCCTAG                                      |
| pV190-R                              | ATATCTACGACAGACGAGGG                                      |
| pV190-CDPK6-F                        | aggactttacttaatggatccATGGGTGTTTGTTCG                      |
| pV190-CDPK6-R                        | cctagacctataactggatccATACGTATAACCAAATTGACCGTGTC           |
